# Supplementary material for: Changes in surface ozone in South Korea on diurnal to decadal timescales for the period of 2001–2021
Source: Copernicus journal article supplement (doi:10.5194/acp-23-12867-2023), 2023-10-13
Supplement: Supplementary file 2 [file acp-23-12867-2023-supplement.zip]

**This supplement includes Table S1-S12 and Figure S1-S15 as listed below.**

Table S1. Information about the surface monitor stations used in this study

Table S2. Comparison of the ground-based hourly  $O_3$ ,  $NO_2$ , and CO observations with the simulations utilizing EDGAR-HTAP v2 (EDV2) and v3 (EDV3) and KORUS v5 (KOV5) emission inventories in each regional box (unit = ppb). N denotes number of samples. R is correlation coefficient.

Table S3. Comparison of aircraft-based 1-minute-interval  $O_3$ ,  $NO_2$ , CO, and HCHO observations with EDV2, EDV3, and KOV5 in each case distinguished by China contribution to  $O_3$  concentration under 2 km height (unit = ppb). N denotes number of samples.  $\sigma$  is standard deviation. R is correlation coefficient.

Table S4. Comparison of surface meteorological observations and WRF-Chem for the KORUS-AQ campaign period. N is number of samples. R (RMSE) denotes correlation coefficient (root-mean-square-error).

Table S5. The area sum emissions in Eastern China (27.7-40°N, 115-123°E), South Korea (34.5-38°N, 126-130°E), and Seoul Metropolitan Area (SMA: 37.2-37.8°N, 126.5-127.3°E) in May 2016 for  $NO_x$ .

Table S6. Spring and summer  $NO_2$  concentrations in Korean metropolitan cities and provinces. Both daytime (10-20 LT) and nighttime (01-06 LT) averages are shown. Differences in concentrations between spring and summer ( $NO_{2\text{ spring}} - NO_{2\text{ summer}}$ ) are in the parenthesis. The data from 2002 to 2019 are utilized.

Table S7. Spring and summer  $O_x$  ( $=O_3+NO_2$ ) concentrations in Korean metropolitan cities and provinces. Both daytime (10-20 LT) and nighttime (01-06 LT) averages are shown. Differences in concentrations between spring and summer ( $O_{x\text{ spring}} - O_{x\text{ summer}}$ ) are in the parenthesis. The data from 2002 to 2019 are utilized.

Table S8. Spring and summer mean temperatures, mean maximum temperatures, and mean wind velocities in Korean metropolitan cities and provinces. Differences in values between spring and summer are in the parenthesis. The cities and provinces listed in the table are in counterclockwise order in regards to the South Korean map. The data from 2001 to 2021 are utilized.

Table S9. Altitudes (m) of monitoring sites in Gangwon-do. Ganseong-eup represents Gosung.

Table S10. Surface and stratospheric  $O_3$  concentrations ( $O_{3s}$ ) and their ratio in Korea simulated by CESM. The concentrations and ratios for the altitude of 1 km are shown in parenthesis.

Table S11. The trends of  $NO_x$  and CO emissions from linear fits of the data covering 2001-2020.

Table S12. The observed trends of  $NO_2$  and CO concentrations from linear fits of the data covering 2001-2021.

Figure S1. The examples of CAM-Chem U, V wind components for spring, 2003. Without nudging, the model simulated U, V do not closely agree with the MERRA2 data.

Figure S2. Monthly variations of CAM-Chem simulated ozone concentration (red line) and observed ozone concentration (black solid line) at each pressure level near Pohang, between 14-17 KST. (Left panel) ~1 degree horizontal resolution simulation, and (right panel) ~2 degree horizontal resolution simulation.

Figure S3. The diurnal variations of observed and simulated O<sub>3</sub> and NO<sub>2</sub> averaged for the simulation period.

Figure S4. The time series of observed and simulated hourly ozone in (top) Seoul and (bottom) Gosung. Basic statistics are shown as follows. Mean bias (MB): Seoul -6.2 ppb /Gosung -0.9 ppb, Root Mean Square Errors (RMSE): Seoul 18.2 ppb/Gosung 13.7 ppb, Correlation Coefficient(R): Seoul 0.68/Gosung 0.54.

Figure S5. Diurnal variations of observed and simulated ozone concentrations averaged for the entire simulation period: (top) Seoul and (bottom) Gosung. Basic statistics are shown in the plot. MB is mean bias. RMSE is root-mean-square-error. R is correlation coefficient.

Figure S6. Averaged O<sub>3</sub> from the ground-based observations and model results for regional boxes that distinguish urban (red box) and non-urban (green box) region (central plot). Box averaged diurnal cycle (solid lines) of O<sub>3</sub> and 1/4 of standard deviations (filled area) from observations (black), the WRF-Chem simulations using EDGAR-HTAP version 2 (EDV2, green), EDGAR-HTAP version 3 (EDV3, blue), and KORUS-AQ version 5 (KOV5, red) are shown. The diurnal cycle plots represent Northern China (NOC, 38-42°N/106-110°E), Sichuan-Chongqing-Guizhou (SCG, 27-33°N/103-109°E), Pearl River Delta (PRD, 21.5-24°N/112-115.5°E), Southeastern China (SEC, 24-28°N/116-120°E), Yangtze River Delta (YRD, 30-33°N/119-122°E), South Korea (KOR, 34.5-38°N/126-130°E), North China Plain (NCP, 34-41°N/113-119°E), and Northeastern China (NEC, 43-47°N/124-130°E).

Figure S7. Averaged model and airborne observations of (a) O<sub>3</sub>, (b) NO<sub>2</sub>, (c) CO, and (d) HCHO (bars) and 1/4 of standard deviations (whiskers) (unit: ppbv) under 2 km height for the Local, Transport, and Chungnam cases from DC-8 (grey), EDV2 (green), EDV3 (blue), and KOV5 (red). The Chungnam (Chungcheongnam-do) region has large point sources like coal-burning power plants and petrochemical facilities that are not well-represented in the bottom-up emission inventories. The local case (May/4, May/20, June/2, June/3) and transport case (May/25, May/26, May/31) represent the dates with the smallest and largest influence from Chinese emissions, respectively. The Chungnam case represents the dates when DC-8 had survey flights targeting the urban and point sources in Chungcheongnam-do and downwind.

Figure S8. Vertically averaged O<sub>3</sub> from DC-8 (black), EDV2 (green), EDV3 (blue), and KOV5 (red) for the Local and Transport cases under 2 km height above ground level. The 1/2 of standard deviations are represented with black whiskers in each 200m layer. Sensitivity tests are conducted with doubled anthropogenic CO and VOC emissions in China (EDV3\_Ch2, blue triangle dots and dashed lines) and in both China and South Korea (EDV3\_ChKo2, blue open square and dotted lines). The model results co-located with the observations are sampled and compared with each other. The sampling numbers in the layers are represented with magenta color. (a) and (b) include the data from all flights while (c) and (d) select the data over SMA (Seoul Metropolitan Area).

Figure S9. Diurnal variations of the model ozone concentrations at surface from various emission scenarios. The model results were averaged for the full simulation period.

Figure S10. (Top) topography map of South Korea and (bottom) West-East vertical cross-section of terrain connecting Seoul and Gosung. Seoul and Gosung in Gangwon-do are

highlighted with color circles. Color bar denotes elevations above sea level (m). A simplified potential ozone transport path is depicted in the bottom plot. Here the ozone layer is colored orange and the terrain is colored gray.

Figure S11. Diurnal O<sub>3</sub> exceedances for the sites that have more exceedances during summer than spring

Figure S12. Diurnal O<sub>3</sub> exceedances for the locations that have similar exceedances for spring and summer

Figure S13. Diurnal O<sub>3</sub> exceedances for the locations that have more exceedances during spring than summer

Figure S14. (Left panel) the number of cars passing highway tolls near the Seoul Metropolitan Area (SMA) from January to October in 2019 and 2020 (top) and 2019 and 2021 (bottom) and (Right panel) reductions (%) in mobility based on transit station mobility metrics and driving mobility index in SMA from Google and Apple mobility report, respectively, covering spring and summer in 2020 (top) and 2021 (bottom) relative to 2019.

Figure S15. Difference (%) in the toll numbers, NO<sub>2</sub>, SO<sub>2</sub>, CO, PM<sub>10</sub>, and PM<sub>2.5</sub> concentrations in SMA during spring and summer: (top) 2020-2019 and (bottom) 2021-2019.

Table S1. Information about the surface monitor stations used in this study

| Index | Station code | City·Province | Site name          | Latitude | Longitude |
|-------|--------------|---------------|--------------------|----------|-----------|
| 1     | 111121       | Seoul         | Jung-gu            | 37.56    | 126.97    |
| 2     | 111123       |               | Jongno-gu          | 37.57    | 127.00    |
| 3     | 111131       |               | Yongsan-gu         | 37.54    | 127.00    |
| 4     | 111141       |               | Gwangjin-gu        | 37.55    | 127.09    |
| 5     | 111142       |               | Seongdong-gu       | 37.54    | 127.04    |
| 6     | 111151       |               | Jungnang-gu        | 37.58    | 127.09    |
| 7     | 111152       |               | Dongdaemun-gu      | 37.58    | 127.03    |
| 8     | 111161       |               | Seongbuk-gu        | 37.61    | 127.03    |
| 9     | 111171       |               | Dobong-gu          | 37.65    | 127.03    |
| 10    | 111181       |               | Eunpyeong-gu       | 37.61    | 126.93    |
| 11    | 111191       |               | Seodaemun-gu       | 37.59    | 126.95    |
| 12    | 111201       |               | Mapo-gu            | 37.56    | 126.91    |
| 13    | 111212       |               | Gangseo-gu         | 37.54    | 126.84    |
| 14    | 111221       |               | Guro-gu            | 37.50    | 126.89    |
| 15    | 111231       |               | Yeongdeungpo-gu    | 37.53    | 126.90    |
| 16    | 111241       |               | Dongjak-gu         | 37.48    | 126.97    |
| 17    | 111251       |               | Gwanak-gu          | 37.49    | 126.93    |
| 18    | 111261       |               | Gangnam-gu         | 37.52    | 127.05    |
| 19    | 111262       |               | Seocho-gu          | 37.50    | 126.99    |
| 20    | 111273       |               | Songpa-gu          | 37.50    | 127.09    |
| 21    | 111274       |               | Gangdong-gu        | 37.55    | 127.14    |
| 22    | 111281       |               | Geumcheon-gu       | 37.45    | 126.91    |
| 23    | 111291       |               | Gangbuk-gu         | 37.65    | 127.01    |
| 24    | 111301       |               | Yangcheon-gu       | 37.53    | 126.86    |
| 25    | 111311       |               | Nowon-gu           | 37.66    | 127.07    |
| 26    | 831492       | Incheon       | Baengnyeong island | 37.96    | 124.63    |
| 27    | 823611       |               | Sinheung           | 37.47    | 126.63    |
| 28    | 823621       |               | Songnim            | 37.47    | 126.64    |
| 29    | 823631       |               | Guwol              | 37.45    | 126.72    |
| 30    | 823632       |               | Sungui             | 37.46    | 126.65    |
| 31    | 823641       |               | Bupyeong           | 37.50    | 126.72    |
| 32    | 823651       |               | Yeonhui            | 37.54    | 126.68    |
| 33    | 823671       |               | Gojan              | 37.40    | 126.70    |
| 34    | 823681       |               | Seongnam           | 37.50    | 126.67    |
| 35    | 823691       |               | Songhae            | 37.76    | 126.46    |
| 36    | 823633       |               | Seokbawi           | 37.46    | 126.69    |
| 37    | 525111       | Daejeon       | Eumnae-dong        | 36.37    | 127.42    |
| 38    | 525112       |               | Munpyeong-dong     | 36.45    | 127.40    |
| 39    | 525121       |               | Munchang-dong      | 36.32    | 127.44    |
| 40    | 525141       |               | Guseong-dong       | 36.37    | 127.37    |
| 41    | 525151       |               | Daeheungdong2      | 36.32    | 127.42    |
| 42    | 525173       |               | Wolpyeong-dong     | 36.35    | 127.35    |
| 43    | 324115       | Gwangju       | Seoseok-dong       | 35.15    | 126.92    |
| 44    | 324121       |               | Nongseong-dong     | 35.15    | 126.89    |
| 45    | 324133       |               | Duam-dong          | 35.17    | 126.93    |
| 46    | 324141       |               | Songjeong1-dong    | 35.14    | 126.80    |
| 47    | 221112       | Busan         | Gwangbok-dong      | 35.10    | 129.03    |
| 48    | 221172       |               | Daeyeon-dong       | 35.13    | 129.09    |

|    |        |                |                  |       |        |
|----|--------|----------------|------------------|-------|--------|
| 49 | 221181 |                | Hakjang-dong     | 35.15 | 128.98 |
| 50 | 221182 |                | Deokcheon-dong   | 35.21 | 129.01 |
| 51 | 221202 |                | Jangnim-dong     | 35.08 | 128.97 |
| 52 | 221152 |                | Jeonpo-dong      | 35.16 | 129.06 |
| 53 | 221221 |                | Yeonsan-dong     | 35.18 | 129.07 |
| 54 | 221141 |                | Taejongdae       | 35.06 | 129.08 |
| 55 | 221191 |                | Cheongnyong-dong | 35.28 | 129.09 |
| 56 | 221192 |                | Jwa-dong         | 35.17 | 129.17 |
| 57 | 221211 |                | Daejeo-dong      | 35.21 | 128.97 |
| 58 | 221212 |                | Noksan-dong      | 35.09 | 128.86 |
| 59 | 221231 |                | Gijang-eup       | 35.24 | 129.22 |
| 60 | 221251 |                | Bugok-dong       | 35.23 | 129.09 |
| 61 | 221271 |                | Gwangan-dong     | 35.16 | 129.12 |
| 62 | 221163 |                | Myeongjang-dong  | 35.20 | 129.10 |
| 63 | 221233 |                | Yongsu-ri        | 35.33 | 129.18 |
| 64 | 221241 |                | Sujeong-dong     | 35.13 | 129.05 |
| 65 | 221281 |                | Daesin-dong      | 35.12 | 129.02 |
| 66 | 221282 |                | Deokpo-dong      | 35.17 | 128.99 |
| 67 | 221283 |                | Gaegeum-dong     | 35.16 | 129.02 |
| 68 | 221284 |                | Dangni-dong      | 35.11 | 128.97 |
| 69 | 221193 |                | Jaesong-dong     | 35.18 | 129.12 |
| 70 | 221142 |                | Cheonghak-dong   | 35.09 | 129.06 |
| 71 | 221183 |                | Hwamyong-dong    | 35.23 | 129.01 |
| 72 | 238120 | Ulsan          | Daesong-dong     | 35.50 | 129.42 |
| 73 | 238121 |                | Seongnam-dong    | 35.56 | 129.32 |
| 74 | 238122 |                | Bugok-dong       | 35.50 | 129.34 |
| 75 | 238124 |                | Yaeum-dong       | 35.53 | 129.33 |
| 76 | 238125 |                | Samsan-dong      | 35.54 | 129.33 |
| 77 | 238127 |                | Sinjeong-dong    | 35.53 | 129.31 |
| 78 | 238128 |                | Deoksil-ri       | 35.43 | 129.31 |
| 79 | 238129 |                | Mugeo-dong       | 35.56 | 129.26 |
| 80 | 238130 |                | Hyomun-dong      | 35.56 | 129.37 |
| 81 | 238371 |                | Hwasal-ri        | 35.44 | 129.34 |
| 82 | 238373 |                | Sangnam-ri       | 35.49 | 129.31 |
| 83 | 238126 |                | Sinjeongno       | 35.53 | 129.30 |
| 84 | 422114 | Daegu          | Suchang-dong     | 35.87 | 128.58 |
| 85 | 422115 |                | Jisan-dong       | 35.83 | 128.63 |
| 86 | 422121 |                | Seoho-dong       | 35.87 | 128.71 |
| 87 | 422132 |                | Ihyeon-dong      | 35.87 | 128.55 |
| 88 | 422141 |                | Daemyeong-dong   | 35.85 | 128.57 |
| 89 | 422153 |                | Nowon-dong       | 35.89 | 128.56 |
| 90 | 422154 |                | Sinam-dong       | 35.89 | 128.63 |
| 91 | 422161 |                | Manchon-dong     | 35.87 | 128.64 |
| 92 | 422171 |                | Horim-dong       | 35.84 | 128.49 |
| 93 | 422113 |                | Namsan-dong      | 35.87 | 128.59 |
| 94 | 422133 |                | Pyeongni-dong    | 35.88 | 128.56 |
| 95 | 339111 | Jeju           | Ido-dong         | 33.50 | 126.53 |
| 96 | 339121 |                | Donghong-dong    | 33.25 | 126.57 |
| 97 | 339312 |                | Gosal-ri(Gosan)  | 33.29 | 126.16 |
| 98 | 533112 | Chungcheongbuk | Songjeong-dong   | 36.64 | 127.44 |
| 99 | 533113 |                | Sacheon-dong     | 36.67 | 127.47 |

|     |        |                |                      |       |        |
|-----|--------|----------------|----------------------|-------|--------|
| 100 | 533114 |                | Yongdam-dong         | 36.64 | 127.50 |
| 101 | 633122 |                | Hoam-dong            | 36.96 | 127.93 |
| 102 | 633131 |                | Jangnak-dong         | 37.15 | 128.22 |
| 103 | 534111 | Chungcheongnam | Seonghwang-dong      | 36.81 | 127.15 |
| 104 | 534421 |                | Dokgot-ri            | 36.99 | 126.39 |
| 105 | 534422 |                | Dongmun-dong         | 36.78 | 126.46 |
| 106 | 132112 | Gangwon        | Jungangno            | 37.88 | 127.72 |
| 107 | 132113 |                | Seoksa-dong          | 37.86 | 127.75 |
| 108 | 632132 |                | Okcheon-dong         | 37.76 | 128.90 |
| 109 | 632121 |                | Jungang-dong         | 37.35 | 127.95 |
| 110 | 632122 |                | Bangok-dong          | 37.34 | 127.98 |
| 111 | 632421 |                | Ganseong-eup(Gosung) | 38.29 | 128.39 |
| 112 | 132401 |                | Bangsan-myeon        | 38.22 | 127.96 |
| 113 | 632371 |                | Bukpyeong-myeon      | 37.43 | 128.66 |
| 114 | 632431 |                | Chiaksan             | 37.36 | 128.13 |
| 115 | 131111 | Gyeonggi       | Sinpung-dong         | 37.28 | 127.01 |
| 116 | 131112 |                | Ingye-dong           | 37.26 | 127.03 |
| 117 | 131113 |                | Gwanggyo-dong        | 37.29 | 127.07 |
| 118 | 131114 |                | Yeongtong-dong       | 37.25 | 127.06 |
| 119 | 131141 |                | Anyang6-dong         | 37.39 | 126.93 |
| 120 | 131142 |                | Burim-dong           | 37.39 | 126.96 |
| 121 | 131144 |                | Hogye-dong           | 37.38 | 126.95 |
| 122 | 131145 |                | Anyang2-dong         | 37.41 | 126.92 |
| 123 | 131121 |                | Dandae-dong          | 37.45 | 127.16 |
| 124 | 131123 |                | Jeongja-dong         | 37.36 | 127.11 |
| 125 | 131131 |                | Uijeongbu-dong       | 37.74 | 127.04 |
| 126 | 131161 |                | Cheolsan-dong        | 37.48 | 126.87 |
| 127 | 131191 |                | Gojan-dong           | 37.32 | 126.83 |
| 128 | 131192 |                | Wonsi-dong           | 37.33 | 126.81 |
| 129 | 131193 |                | Bono-dong            | 37.30 | 126.87 |
| 130 | 131194 |                | Wongok-dong          | 37.33 | 126.80 |
| 131 | 131195 |                | Bugok-dong           | 37.33 | 126.86 |
| 132 | 131196 |                | Daebu-dong           | 37.24 | 126.59 |
| 133 | 131341 |                | Bijeon-dong          | 36.99 | 127.11 |
| 134 | 131201 |                | Byeollyang-dong      | 37.42 | 126.99 |
| 135 | 131202 |                | Gwacheon-dong        | 37.45 | 127.00 |
| 136 | 131211 |                | Gyomun-dong          | 37.59 | 127.13 |
| 137 | 131212 |                | Donggu-dong          | 37.62 | 127.14 |
| 138 | 131222 |                | Bugok3-dong          | 37.32 | 126.95 |
| 139 | 131381 |                | Haengsin-dong        | 37.62 | 126.84 |
| 140 | 131382 |                | Siksa-dong           | 37.69 | 126.81 |
| 141 | 131501 |                | Dang-dong            | 37.35 | 126.95 |
| 142 | 131502 |                | Sanbon-dong          | 37.36 | 126.93 |
| 143 | 131231 |                | Jeongwang-dong       | 37.35 | 126.74 |
| 144 | 131232 |                | Sihwasandan          | 37.34 | 126.72 |
| 145 | 131233 |                | Daeya-dong           | 37.44 | 126.79 |
| 146 | 831151 |                | Sosabon-dong         | 37.48 | 126.80 |
| 147 | 831152 |                | Nae-dong             | 37.52 | 126.77 |
| 148 | 831153 |                | Jung2-dong           | 37.49 | 126.77 |
| 149 | 831154 |                | Ojeong-dong          | 37.53 | 126.80 |
| 150 | 131241 |                | Geumgok-dong         | 37.64 | 127.22 |

|     |        |               |                   |       |        |
|-----|--------|---------------|-------------------|-------|--------|
| 151 | 131411 |               | Gimnyangjang-dong | 37.23 | 127.20 |
| 152 | 131471 |               | Sau-dong          | 37.62 | 126.72 |
| 153 | 131472 |               | Gochon-eup        | 37.61 | 126.76 |
| 154 | 131473 |               | Wolgot-myeon      | 37.72 | 126.55 |
| 155 | 131531 |               | Osan-dong         | 37.16 | 127.08 |
| 156 | 131541 |               | Sinjang-dong      | 37.54 | 127.21 |
| 157 | 437112 | Gyeongsangbuk | Jangheung-dong    | 35.98 | 129.37 |
| 158 | 437113 |               | Jangnyang-dong    | 36.07 | 129.38 |
| 159 | 437151 |               | Gongdan-dong      | 36.10 | 128.39 |
| 160 | 437152 |               | Wonpyeong-dong    | 36.13 | 128.33 |
| 161 | 437153 |               | Hyeonggok-dong    | 36.11 | 128.34 |
| 162 | 437131 |               | Mundang-dong      | 36.14 | 128.09 |
| 163 | 437122 |               | Seonggeon-dong    | 35.85 | 129.21 |
| 164 | 437141 |               | Myeongnyun-dong   | 36.57 | 128.73 |
| 165 | 437161 |               | Gaheung-dong      | 36.82 | 128.61 |
| 166 | 437402 |               | Yeongcheon-si     | 35.97 | 128.94 |
| 167 | 437541 |               | Taeha-ri          | 37.52 | 130.80 |
| 168 | 238111 | Gyeongsangnam | Hoewon-dong       | 35.22 | 128.57 |
| 169 | 238112 |               | Bongam-dong       | 35.22 | 128.60 |
| 170 | 238141 |               | Myeongseo-dong    | 35.24 | 128.64 |
| 171 | 238142 |               | Ungnam-dong       | 35.21 | 128.66 |
| 172 | 238143 |               | Seongju-dong      | 35.20 | 128.71 |
| 173 | 238151 |               | Gyeonghwa-dong    | 35.15 | 128.69 |
| 174 | 238131 |               | Sangbong-dong     | 35.20 | 128.08 |
| 175 | 238181 |               | Dongsang-dong     | 35.24 | 128.88 |
| 176 | 238361 |               | Bukbu-dong        | 35.35 | 129.04 |
| 177 | 335115 | Jeollabuk     | Nosong-dong       | 35.83 | 127.15 |
| 178 | 735111 |               | Samcheon-dong     | 35.80 | 127.12 |
| 179 | 735114 |               | Palbok-dong       | 35.85 | 127.09 |
| 180 | 735121 |               | Sinpung-dong      | 35.97 | 126.70 |
| 181 | 735122 |               | Soryong-dong      | 35.97 | 126.65 |
| 182 | 735123 |               | Gaejeong-dong     | 35.96 | 126.75 |
| 183 | 735132 |               | Namjung-dong      | 35.95 | 126.96 |
| 184 | 735151 |               | Jukang-dong       | 35.41 | 127.38 |
| 185 | 336121 | Jeollanam     | Seogang-dong      | 34.74 | 127.73 |
| 186 | 336124 |               | Wollae-dong       | 34.85 | 127.72 |
| 187 | 336352 |               | Jung-dong         | 34.94 | 127.70 |
| 188 | 336353 |               | Taein-dong        | 34.94 | 127.76 |
| 189 | 336354 |               | Jinsang-myeon     | 35.02 | 127.72 |
| 190 | 336131 |               | Jangcheon-dong    | 34.95 | 127.49 |
| 191 | 336111 |               | Yongdang-dong     | 34.81 | 126.39 |
| 192 | 336441 |               | Nabul-ri          | 34.77 | 126.44 |

Table S2. Comparison of the ground-based hourly O<sub>3</sub>, NO<sub>2</sub>, and CO observations with the simulations utilizing EDGAR-HTAP v2 (EDV2) and v3 (EDV3) and KORUS v5 (KOV5) emission inventories in each regional box (unit = ppb). N denotes number of samples. R is correlation coefficient.

| Region         |      | <sup>1)</sup> NCP | <sup>1),a)</sup> SCG | <sup>1)</sup> YRD | <sup>1)</sup> PRD | <sup>1),b)</sup> KOR (SMA) | <sup>2),c)</sup> NEC | <sup>2),d)</sup> NOC | <sup>2),e)</sup> SEC |      |
|----------------|------|-------------------|----------------------|-------------------|-------------------|----------------------------|----------------------|----------------------|----------------------|------|
| N              |      | 190               | 104                  | 93                | 68                | 358 (125)                  | 45                   | 28                   | 43                   |      |
| O <sub>3</sub> | OBS  | Mean              | 44.5                 | 34.6              | 38.2              | 27.9                       | 41.5 (36.6)          | 40.9                 | 44.3                 | 26.1 |
|                |      | Mean              | 32.2                 | 53.5              | 21.6              | 27.6                       | 40.5 (31.1)          | 28.6                 | 39.4                 | 40.8 |
|                | EDV2 | Bias              | -12.3                | 18.9              | -16.6             | -0.3                       | -1.0 (-5.5)          | -12.3                | -4.9                 | 14.7 |
|                |      | R                 | 0.65                 | 0.53              | 0.62              | 0.61                       | 0.59 (0.60)          | 0.48                 | 0.63                 | 0.52 |
|                |      | Mean              | 43.4                 | 57.5              | 35.7              | 34.7                       | 41.0 (32.6)          | 35.2                 | 43.7                 | 45.5 |
|                | EDV3 | Bias              | -1.1                 | 23.0              | -2.5              | 6.8                        | -0.5 (-4.0)          | -5.7                 | -0.6                 | 19.4 |
|                |      | R                 | 0.68                 | 0.55              | 0.66              | 0.65                       | 0.56 (0.57)          | 0.63                 | 0.67                 | 0.55 |
|                |      | Mean              | 49.0                 | 55.3              | 41.1              | 35.7                       | 42.2 (33.1)          | 37.1                 | 43.8                 | 42.4 |
|                | KOV5 | Bias              | 4.5                  | 20.7              | 2.8               | 7.8                        | 0.7 (-3.5)           | -3.8                 | -0.5                 | 16.3 |
|                |      | R                 | 0.71                 | 0.53              | 0.65              | 0.70                       | 0.62 (0.64)          | 0.62                 | 0.67                 | 0.54 |

1) Urban area, 2) Non-urban area

a) Sichuan-Chongqing-Guizhou, b) South Korea (SMA-Seoul Metropolitan Area), c) Northeastern China, d) Northern China, e) Southeastern China



Table S3. Comparison of aircraft-based 1-minute-interval O<sub>3</sub>, NO<sub>2</sub>, CO, and HCHO observations with EDV2, EDV3, and KOV5 in each case distinguished by China contribution to O<sub>3</sub> concentration under 2 km height (unit = ppb). N denotes number of samples.  $\sigma$  is standard deviation. R is correlation coefficient.

| Species        | Case                                | Type        | N    | Mean | Bias  | $\sigma$ | R    |
|----------------|-------------------------------------|-------------|------|------|-------|----------|------|
| O <sub>3</sub> | <b>Local</b><br>(5/4,20 , 6/2,3)    | <b>OBS</b>  | 1125 | 81.2 |       | 15.3     |      |
|                |                                     | <b>EDV2</b> |      | 65.2 | -15.9 | 13.4     | 0.66 |
|                |                                     | <b>EDV3</b> |      | 65.2 | -16.0 | 12.8     | 0.59 |
|                |                                     | <b>KOV5</b> |      | 62.6 | -18.5 | 11.5     | 0.70 |
|                | <b>Transport</b><br>(5/25,26 , 6/1) | <b>OBS</b>  | 605  | 95.6 |       | 19.1     |      |
|                |                                     | <b>EDV2</b> |      | 87.3 | -8.3  | 13.8     | 0.64 |
|                |                                     | <b>EDV3</b> |      | 93.1 | -2.5  | 16.0     | 0.67 |
|                |                                     | <b>KOV5</b> |      | 84.8 | -10.8 | 14.3     | 0.69 |
|                | <b>Chungnam</b><br>(5/22 , 6/5)     | <b>OBS</b>  | 812  | 98.4 |       | 17.8     |      |
|                |                                     | <b>EDV2</b> |      | 61.6 | -36.8 | 14.3     | 0.14 |
|                |                                     | <b>EDV3</b> |      | 60.2 | -38.2 | 14.2     | 0.07 |
|                |                                     | <b>KOV5</b> |      | 60.3 | -38.1 | 14.0     | 0.17 |

Table S4. Comparison of surface meteorological observations and WRF-Chem for the KORUS-AQ campaign period. N is number of samples. R (RMSE) denotes correlation coefficient (root-mean-square-error).

| Nation   |            | Eastern China (sites = 271) |                       |                  | South Korea (sites = 48) |                       |                  |
|----------|------------|-----------------------------|-----------------------|------------------|--------------------------|-----------------------|------------------|
| Variable |            | Temperature (°C)            | Relative humidity (%) | Wind speed (m/s) | Temperature (°C)         | Relative humidity (%) | Wind speed (m/s) |
| Mean     | N          | 83698                       | 83696                 | 79595            | 14948                    | 14946                 | 14103            |
|          | Obervation | 20.13                       | 65.02                 | 2.87             | 18.94                    | 65.81                 | 2.56             |
|          | WRF-Chem   | 19.22                       | 65.35                 | 4.12             | 17.23                    | 71.35                 | 3.84             |
|          | R          | 0.90                        | 0.85                  | 0.55             | 0.88                     | 0.76                  | 0.62             |
|          | Mean bias  | -0.91                       | 0.32                  | 1.25             | -1.71                    | 5.54                  | 1.27             |
|          | RMSE       | 3.20                        | 13.94                 | 2.45             | 2.84                     | 15.88                 | 2.31             |

Table S5. The area sum emissions in Eastern China (27.7-40°N, 115-123°E), South Korea (34.5-38°N, 126-130°E), and Seoul Metropolitan Area (SMA: 37.2-37.8°N, 126.5-127.3°E) in May 2016 for NO<sub>x</sub>. NO<sub>x</sub> emissions from SSP5-8.5 (CESM/CAM-Chem) and EDGAR-HTAP v3, v2, and KORUS v5 (WRF-Chem) are compared. Over China, SSP5-8.5 NO<sub>x</sub> emissions are slightly larger than those in KORUS v5 and are lower than those in EDGAR-HTAP v3. SSP5-8.5 has much lower NO<sub>x</sub> emissions over South Korea and SMA, compared to EDGAR-HTAP v3. “No SMA” simulations with WRF-Chem may help estimate the uncertainty in the simulated O<sub>3</sub> originated from the emission discrepancy. “No SMA” increases O<sub>3</sub> concentrations over South Korea (SMA) by 1.87 (22.1) ppb. CMIP6 (CESM/CAM-Chem) (not shown in the table) is based on EDGAR v4.2 or v4.3.2 described in Feng et al. (2020) (Feng, L., Smith, S. J., Braun, C., Crippa, M., Gidden, M. J., Hoesly, R., Klimont, Z., van Marle, M., van den Berg, M., and van der Werf, G. (2020). The generation of gridded emissions data for CMIP6. *Geoscientific Model Development*, 13, 461-482, doi.org/10.5194/gmd-13-461-2020).

| <b>NO<sub>x</sub> emission</b><br>(unit = mols/s) | <b>SSP5-8.5</b> | <b>EDGAR-HATP v3</b> | <b>EDGAR-HATP v2</b> | <b>KORUS v5</b> |
|---------------------------------------------------|-----------------|----------------------|----------------------|-----------------|
| Eastern China                                     | 6638            | 9034                 | 10063                | 5482            |
| South Korea                                       | 303             | 1097                 | 990                  | 886             |
| SMA                                               | 26              | 214                  | 196                  | 191             |

Table S6. Spring and summer NO<sub>2</sub> concentrations in Korean metropolitan cities and provinces. Both daytime (10-20 LT) and nighttime (01-06 LT) averages are shown. Differences in concentrations between spring and summer (NO<sub>2</sub> <sub>spring</sub> – NO<sub>2</sub> <sub>summer</sub>) are in the parenthesis. The data from 2002 to 2019 are utilized.

| Location   |                         | Daytime period                  | Nighttime period                |
|------------|-------------------------|---------------------------------|---------------------------------|
|            |                         | Spring / Summer<br>(difference) | Spring / Summer<br>(difference) |
| City       | Seoul (SUL)             | 36.1 / 29.5 (6.6)               | 36.9 / 24.6 (12.3)              |
|            | Incheon (INC)           | 30.5 / 24.3 (6.3)               | 28.5 / 19.7 (8.8)               |
|            | Daejeon (DJN)           | 16.1 / 12.0 (4.1)               | 20.5 / 13.6 (6.9)               |
|            | Gwangju (GWJ)           | 19.8 / 13.4 (6.4)               | 19.0 / 10.4 (8.6)               |
|            | Busan (BSN)             | 20.9 / 13.9 (7.0)               | 24.3 / 14.5 (9.8)               |
|            | Ulsan (ULS)             | 23.9 / 20.1 (3.8)               | 21.2 / 15.3 (5.9)               |
|            | Daegu (DGU)             | 24.3 / 16.6 (7.7)               | 26.0 / 15.4 (10.6)              |
| Province   | Gyeonggi-do (GGI)       | 27.3 / 20.8 (6.5)               | 31.2 / 20.7 (10.5)              |
|            | Chungcheongbuk-do (CCB) | 18.9 / 13.6 (5.3)               | 20.8 / 13.7 (7.1)               |
|            | Chungcheongnam-do (CCN) | 17.4 / 12.9 (4.5)               | 18.0 / 11.9 (6.1)               |
|            | Jeollabuk-do (JLB)      | 15.1 / 11.2 (3.9)               | 14.1 / 9.2 (4.9)                |
|            | Jeollanam-do (JLN)      | 17.4 / 14.0 (3.4)               | 14.1 / 10.5 (3.6)               |
|            | Jeju Island (JEJ)       | 12.0 / 8.5 (3.5)                | 8.5 / 6.0 (2.5)                 |
|            | Gyeongsangnam-do (GSN)  | 18.6 / 15.0 (3.6)               | 18.9 / 13.3 (5.6)               |
|            | Gyeongsangbuk-do (GSB)  | 17.9 / 13.4 (4.5)               | 20.5 / 13.6 (6.9)               |
| Background | Gangwon-do (GWO)        | 14.0 / 9.9 (4.1)                | 13.4 / 8.1 (5.3)                |
|            | Ulleung Island (ULL)    | 3.4 / 2.7 (0.7)                 | 3.3 / 2.8 (0.5)                 |
|            | Gosung (GSU)            | 4.5 / 2.6 (1.9)                 | 4.6 / 2.8 (1.8)                 |

Table S7. Spring and summer  $O_x$  ( $=O_3+NO_2$ ) concentrations in Korean metropolitan cities and provinces. Both daytime (10-20 LT) and nighttime (01-06 LT) averages are shown. Differences in concentrations between spring and summer ( $O_{x \text{ spring}} - O_{x \text{ summer}}$ ) are in the parenthesis. The data from 2002 to 2019 are utilized.

| Location   |                         | Daytime period                  | Nighttime period                |
|------------|-------------------------|---------------------------------|---------------------------------|
|            |                         | Spring / Summer<br>(difference) | Spring / Summer<br>(difference) |
| City       | Seoul (SUL)             | 70.8 / 65.0 (5.8)               | 57.4 / 41.6 (15.8)              |
|            | Incheon (INC)           | 65.2 / 57.0 (8.2)               | 53.6 / 39.4 (14.2)              |
|            | Daejeon (DJN)           | 57.8 / 48.7 (9.1)               | 43.4 / 32.3 (11.1)              |
|            | Gwangju (GWJ)           | 59.9 / 48.6 (11.3)              | 47.5 / 34.0 (13.5)              |
|            | Busan (BSN)             | 61.4 / 47.6 (13.8)              | 54.6 / 36.4 (18.2)              |
|            | Ulsan (ULS)             | 62.8 / 53.2 (9.6)               | 46.9 / 33.5 (13.4)              |
|            | Daegu (DGU)             | 64.3 / 53.9 (10.4)              | 50.0 / 34.5 (15.5)              |
| Province   | Gyeonggi-do (GGI)       | 65.1 / 58.9 (6.2)               | 51.9 / 38.1 (13.8)              |
|            | Chungcheongbuk-do (CCB) | 61.5 / 53.2 (8.3)               | 45.7 / 34.2 (11.5)              |
|            | Chungcheongnam-do (CCN) | 58.8 / 49.9 (8.9)               | 47.3 / 34.2 (13.1)              |
|            | Jeollabuk-do (JLB)      | 53.4 / 45.5 (7.9)               | 40.7 / 32.0 (8.7)               |
|            | Jeollanam-do (JLN)      | 60.5 / 48.9 (11.6)              | 47.5 / 34.4 (13.1)              |
|            | Jeju Island (JEJ)       | 61.3 / 42.7 (18.6)              | 52.5 / 34.6 (17.9)              |
|            | Gyeongsangnam-do (GSN)  | 63.3 / 54.8 (8.5)               | 47.8 / 34.9 (12.9)              |
|            | Gyeongsangbuk-do (GSB)  | 63.4 / 50.9 (12.5)              | 49.0 / 33.7 (15.3)              |
| Background | Gangwon-do (GWO)        | 58.5 / 49.0 (9.5)               | 41.3 / 28.6 (12.7)              |
|            | Ulleung Island (ULL)    | 60.0 / 46.6 (13.4)              | 59.2 / 45.9 (13.3)              |
|            | Gosung (GSU)            | 62.8 / 45.5 (17.3)              | 62.7 / 47.9 (15.0)              |

Table S8. Spring and summer mean temperatures, mean maximum temperatures, and mean wind velocities in Korean metropolitan cities and provinces. Differences in values between spring and summer are in the parenthesis. The cities and provinces listed in the table are in counterclockwise order in regards to the South Korean map. The data from 2001 to 2021 are utilized.

| Location |                   | Mean temperature (°C)        | Mean maximum temperature (°C) | Mean wind velocity (m/s) |
|----------|-------------------|------------------------------|-------------------------------|--------------------------|
|          |                   | Spring / Summer (difference) |                               |                          |
| City     | Seoul             | 12.4 / 24.9 (-12.5)          | 17.7 / 29.0 (-11.3)           | 2.6 / 2.2 (0.4)          |
|          | Incheon           | 11.6 / 23.9 (-12.3)          | 16.1 / 27.5 (-11.4)           | 3.2 / 2.5 (0.7)          |
|          | Daejeon           | 12.9 / 24.9 (-12.0)          | 19.1 / 29.3 (-10.2)           | 2.0 / 1.8 (0.2)          |
|          | Gwangju           | 13.5 / 25.2 (-11.7)          | 19.7 / 29.8 (-10.1)           | 2.0 / 2.0 (0.0)          |
|          | Busan             | 13.7 / 24.0 (-10.3)          | 18.1 / 27.4 (-9.3)            | 3.5 / 3.2 (0.3)          |
|          | Ulsan             | 13.6 / 24.4 (-10.8)          | 19.1 / 28.7 (-9.6)            | 2.3 / 2.0 (0.3)          |
|          | Daegu             | 14.3 / 25.5 (-11.2)          | 20.3 / 30.3 (-10.0)           | 2.4 / 2.2 (0.2)          |
| Province | Gyeonggi-do       | 11.5 / 24.0 (-12.5)          | 17.1 / 28.4 (-11.3)           | 2.3 / 2.0 (0.3)          |
|          | Chungcheongbuk-do | 11.6 / 23.7 (-12.1)          | 18.4 / 28.8 (-10.4)           | 2.1 / 1.5 (0.6)          |
|          | Chungcheongnam-do | 11.3 / 24.0 (-12.7)          | 17.8 / 28.8 (-11.0)           | 2.0 / 1.6 (0.4)          |
|          | Jeollabuk-do      | 12.3 / 24.7 (-12.4)          | 18.7 / 29.6 (-10.9)           | 1.9 / 1.6 (0.3)          |
|          | Jeollanam-do      | 12.6 / 24.2 (-11.6)          | 18.0 / 28.2 (-10.2)           | 3.0 / 2.5 (0.5)          |
|          | Jeju Island       | 14.7 / 25.1 (-10.4)          | 18.4 / 28.1 (-9.7)            | 3.1 / 2.8 (0.3)          |
|          | Gyeongsangnam-do  | 13.0 / 24.4 (-11.4)          | 19.6 / 29.4 (-9.8)            | 1.8 / 1.5 (0.3)          |
|          | Gyeongsangbuk-do  | 12.4 / 23.7 (-11.3)          | 18.8 / 28.7 (-9.9)            | 2.3 / 1.7 (0.6)          |
|          | Gangwon-do        | 11.5 / 23.4 (-11.9)          | 17.6 / 28.2 (-10.6)           | 2.0 / 1.6 (0.4)          |

Table S9. Altitudes (m) of monitoring sites in Gangwon-do. Ganseong-eup represents Gosung.

|         | Name            | Latitude | Longitude | Altitude(m) |
|---------|-----------------|----------|-----------|-------------|
|         | Jungangno       | 37.87564 | 127.72048 | 110.1613    |
|         | Seoksa-dong     | 37.85707 | 127.7495  | 195.0629    |
|         | Okcheon-dong    | 37.76003 | 128.90297 | 81.9188     |
|         | Jungang-dong    | 37.35279 | 127.94746 | 194.5183    |
| Gangwon | Bangok-dong     | 37.3356  | 127.9771  | 274.9333    |
|         | Ganseong-eup    | 38.28744 | 128.38521 | 586.4231    |
|         | Bangsan-myeon   | 38.22439 | 127.95856 | 456.5462    |
|         | Bukpyeong-myeon | 37.43023 | 128.66476 | 631.8139    |
|         | Chiaksan        | 37.36014 | 128.12509 | 587.2285    |

Table S10. Surface and stratospheric O<sub>3</sub> concentrations (O<sub>3S</sub>\*) and their ratio in Korea simulated by CESM. The concentrations and ratios for the altitude of 1 km are shown in parenthesis.

| Season | Surface O <sub>3</sub> | Stratospheric O <sub>3</sub> (O <sub>3S</sub> ) | Ratio (O <sub>3S</sub> /O <sub>3</sub> ) (%) |
|--------|------------------------|-------------------------------------------------|----------------------------------------------|
| DJF    | 30.4 (46.2)            | 23.2 (26.4)                                     | 76.2 (57.2)                                  |
| MAM    | 45.3 (64.2)            | 16.7 (21.4)                                     | 36.9 (33.3)                                  |
| JJA    | 45.9 (53.9)            | 2.0 (3.0)                                       | 4.3 (5.6)                                    |
| SON    | 36.3 (51.1)            | 9.8 (12.1)                                      | 26.9(23.8)                                   |

\*CESM2.2 calculates O<sub>3S</sub> as a 3-D variable in space. Originally, O<sub>3S</sub> is O<sub>3</sub> above tropopause. The O<sub>3S</sub> is transported and undergoes chemical losses below tropopause as

$$O_{3S} = O_{3S} * \exp(-O_{3S\_Loss}).$$

The O<sub>3S</sub>\_Loss rate by chemical reactions in the troposphere is calculated:

$$O_{3S\_Loss} = 2.0 * O\_O_3 + O1D\_H_2O + HO_2\_O_3 + OH\_O_3 + H\_O_3 + 2.0 * NO_2\_O + 2.0 * jno_3\_b + 2.0 * CLO\_O + 2.0 * jcl_2O_2 + 2.0 * CLO\_CLOa + 2.0 * CLO\_CLOb + 2.0 * BRO\_CLOb + 2.0 * BRO\_CLOc + 2.0 * BRO\_BRO + 2.0 * BRO\_O + CLO\_HO_2 + BRO\_HO_2 + S\_O_3 + SO\_O_3 + C_2H_4\_O_3 + C_3H_6\_O_3 + ISOP\_O_3 + MVK\_O_3 + MACR\_O_3 + MTERP\_O_3 + BCARY\_O_3.$$

ISOP=isoprene

MVK= methyl vinyl ketone

MACR=methacrolein

MTERP= pinene\_a + carene\_3 + thujene\_a + 2met\_styrene + cymene\_p + cymene\_o + terpinolene + bornene + fenchene\_a + ocimene\_al + pinene\_b + sabinene + camphene + limonene + phellandrene\_a + terpinene\_g + terpinene\_a + phellandrene\_b + myrcene + ocimene\_t\_b + ocimene\_c\_b

BCARY= caryophyllene\_b + bergamotene\_a + bisabolene\_b + farnescene\_b + humulene\_a.

For details in chemical mechanism, refer to Emmons, L. K. et al., 2020 [The chemistry mechanism in the Community Earth System Model Version 2 (CESM2), Journal of Advances in Modeling Earth Systems, <https://doi.org/10.1029/2019MS001882>].



Table S11. The trends of NO<sub>x</sub> and CO emissions from linear fits of the data covering 2001-2020.

| Stations |                   | NO <sub>x</sub> (kton/yr)<br>Slope (Correlation<br>Coefficient) | CO (kton/yr)<br>Slope (Correlation<br>Coefficient) |
|----------|-------------------|-----------------------------------------------------------------|----------------------------------------------------|
| City     | Seoul             | -2.35 (-0.72)                                                   | -8.02 (-0.97)                                      |
|          | Incheon           | -1.14 (-0.60)                                                   | -0.74 (-0.73)                                      |
|          | Daejeon           | -0.56 (-0.84)                                                   | -0.84 (-0.88)                                      |
|          | Gwangju           | -0.29 (-0.63)                                                   | -0.72 (-0.94)                                      |
|          | Busan             | -1.23 (-0.77)                                                   | -2.01 (-0.94)                                      |
|          | Ulsan             | -1.27 (-0.90)                                                   | -0.12 (-0.37)                                      |
|          | Daegu             | -0.85 (-0.74)                                                   | -1.37 (-0.87)                                      |
| Province | Gyeonggi-do       | -1.30 (-0.47)                                                   | -1.51 (-0.67)                                      |
|          | Chungcheongbuk-do | 0.52 (0.46)                                                     | 0.40 (0.40)                                        |
|          | Chungcheongnam-do | -5.32 (-0.74)                                                   | 1.49 (0.93)                                        |
|          | Jeollabuk-do      | -0.66 (-0.82)                                                   | 0.61 (0.53)                                        |
|          | Jeollanam-do      | 0.74 (0.57)                                                     | 1.63 (0.75)                                        |
|          | Jeju Island       | 0.27 (0.64)                                                     | 0.31 (0.58)                                        |
|          | Gyeongsangnam-do  | -5.47 (-0.83)                                                   | -0.09 (-0.14)                                      |
|          | Gyeongsangbuk-do  | 0.78 (0.52)                                                     | 2.19 (0.76)                                        |
|          | Gangwon-do        | 0.25 (0.17)                                                     | 0.95 (0.67)                                        |

Table S12. The observed trends of NO<sub>2</sub> and CO concentrations from linear fits of the data covering 2001-2021.

| Stations |                | NO <sub>2</sub><br>Spring / Summer<br>Slope (Correlation Coefficient) | CO<br>Spring / Summer<br>Slope (Correlation Coefficient) |
|----------|----------------|-----------------------------------------------------------------------|----------------------------------------------------------|
| City     | Seoul          | -0.77 (-0.85)/-0.72(-0.91)                                            | -7.56(-0.77)/-5.34(-0.83)                                |
|          | Incheon        | -0.37(-0.62)/-0.50(-0.62)                                             | -7.65(-0.71)/-4.64(-0.66)                                |
|          | Daejeon        | -0.10(-0.29)/-0.12(-0.50)                                             | -15.53(-0.79)/-9.71(-0.64)                               |
|          | Gwangju        | -0.51(-0.85)/-0.35(-0.88)                                             | -10.64(-0.81)/-8.00(-0.69)                               |
|          | Busan          | -0.64(-0.89)/-0.49(-0.90)                                             | -12.32(-0.83)/-11.05(-0.81)                              |
|          | Ulsan          | -0.04(-0.08)/-0.06(-0.16)                                             | -4.80(-0.39)/-0.75(0.07)                                 |
|          | Daegu          | -0.65(-0.87)/-0.51(-0.89)                                             | -23.49(-0.90)/-19.87(-0.87)                              |
| Province | Gyeonggi       | -0.41(-0.66)/-0.44(-0.79)                                             | -14.50(-0.95)/-8.82(-0.94)                               |
|          | Chungcheongbuk | -0.18(0.39)/-0.16(-0.45)                                              | -17.68(-0.78)/-6.49(-0.61)                               |
|          | Chungcheongnam | -0.10(-0.30)/-0.12(-0.41)                                             | -20.95(-0.76)/-9.33(-0.69)                               |
|          | Jeollabuk      | -0.17(-0.42)/-0.25(-0.65)                                             | -21.33(-0.87)/-15.07(-0.85)                              |
|          | Jeollanam      | -0.21(-0.51)/-0.21(-0.58)                                             | -5.86(-0.53)/-5.32(-0.48)                                |
|          | Jeju Island    | -0.18(-0.38)/-0.16(-0.46)                                             | -10.74(-0.71)/-6.95(-0.50)                               |
|          | Gyeongsangnam  | -0.12(-0.31)/-0.10(-0.40)                                             | -6.76(-0.58)/-3.92(-0.46)                                |
|          | Gyeongsangbuk  | -0.76(-0.89)/-0.49(-0.88)                                             | -27.54(-0.82)/-17.48(-0.78)                              |
|          | Gangwon        | -0.16(-0.50)/-0.20(-0.69)                                             | -15.31(-0.86)/-9.03(-0.71)                               |

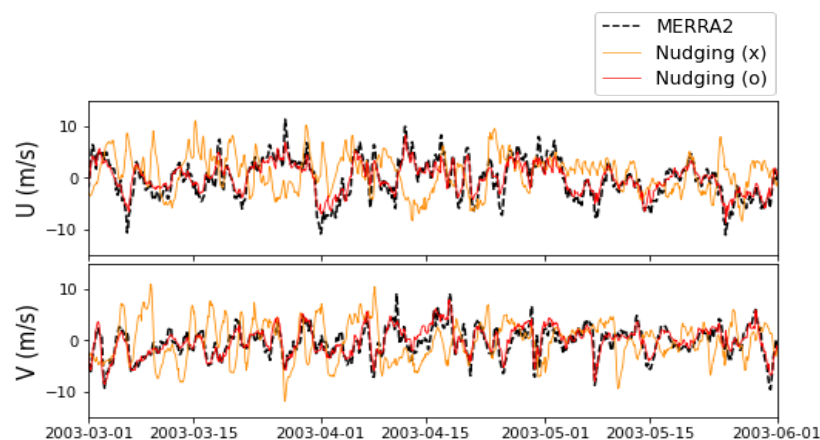

Figure S1. The examples of CAM-Chem U, V wind components for spring, 2003. Without nudging, the model simulated U, V do not closely agree with the MERRA2 data.

1d\_ssp

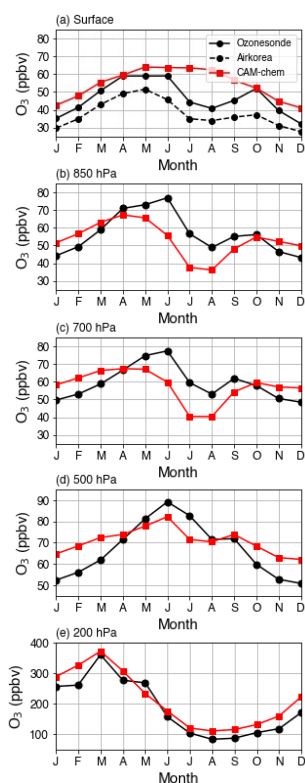

2d\_ssp

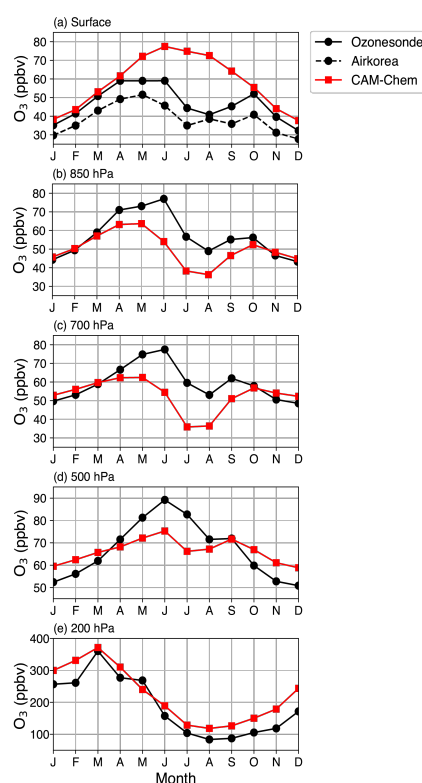

Figure S2. Monthly variations of CAM-Chem simulated ozone concentration (red line) and observed ozone concentration (black solid line) at each pressure level near Pohang, between 14-17 KST. (Left panel) ~1 degree horizontal resolution simulation, and (right panel) ~2 degree horizontal resolution simulation.

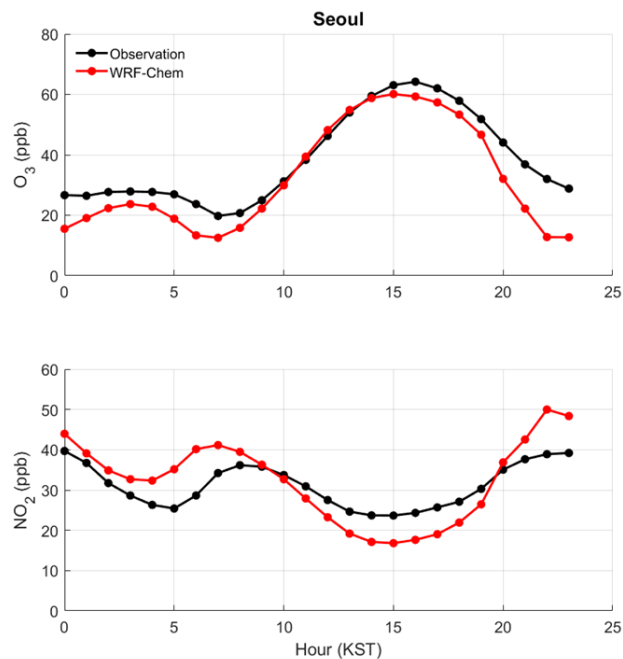

Figure S3. The diurnal variations of observed and simulated O<sub>3</sub> and NO<sub>2</sub> averaged for the simulation period.

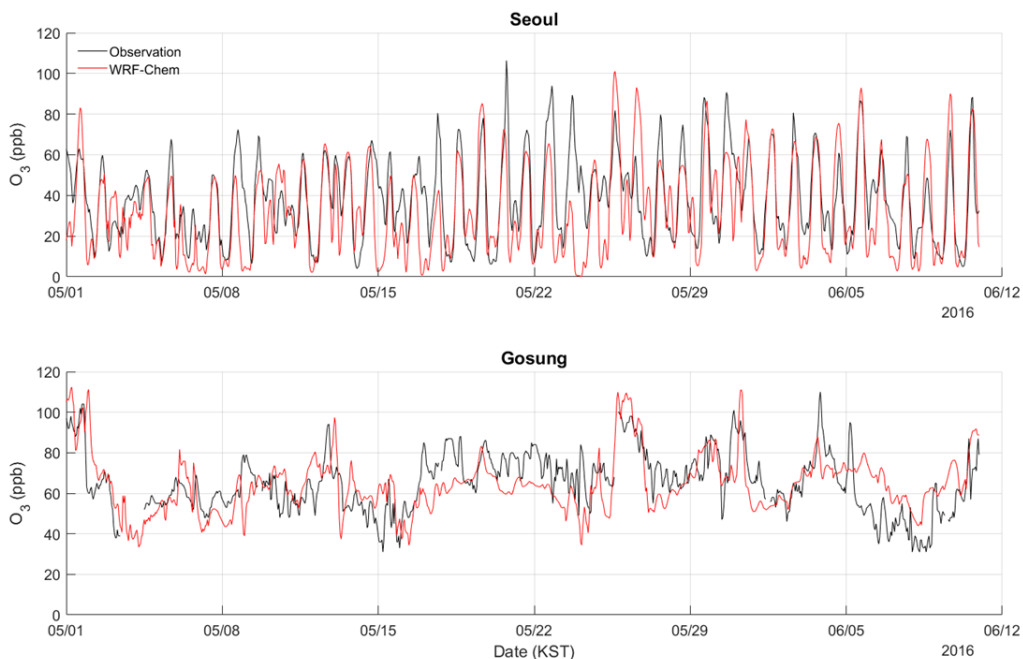

Figure S4. The time series of observed and simulated hourly ozone in (top) Seoul and (bottom) Gosung. Basic statistics are shown as follows. Mean bias (MB): Seoul -6.2 ppb /Gosung -0.9 ppb, Root Mean Square Errors (RMSE): Seoul 18.2 ppb/Gosung 13.7 ppb, Correlation Coefficient(R): Seoul 0.68/Gosung 0.54.

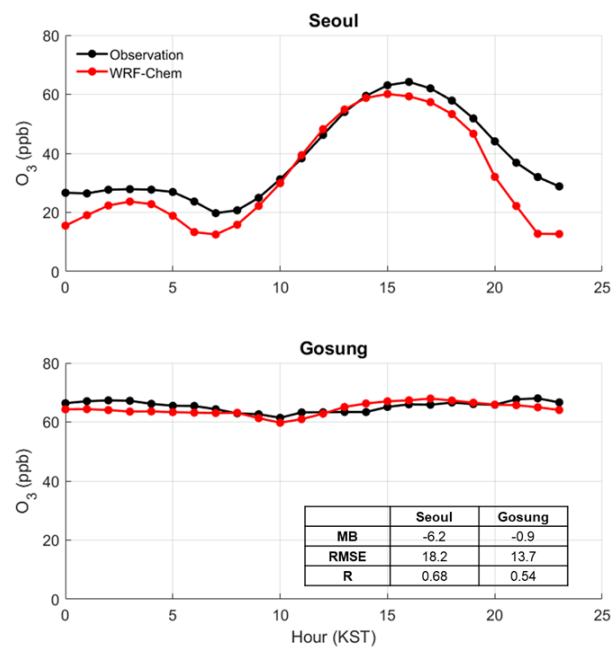

Figure S5. Diurnal variations of observed and simulated ozone concentrations averaged for the entire simulation period: (top) Seoul and (bottom) Gosung. Basic statistics are shown in the plot. MB is mean bias. RMSE is root-mean-square-error. R is correlation coefficient.

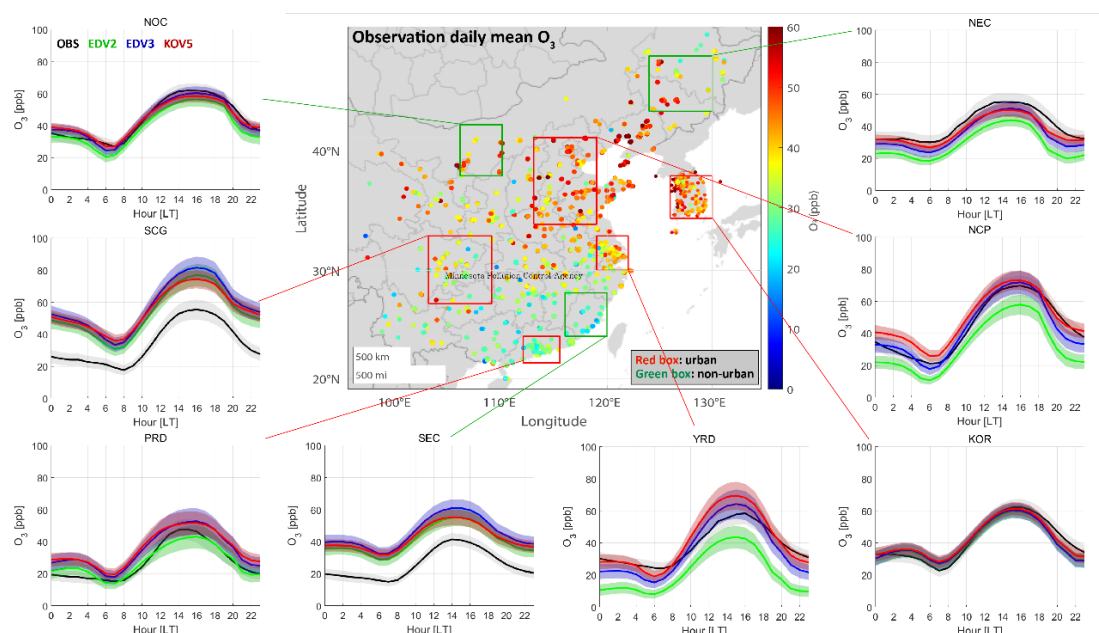

Figure S6. Averaged  $O_3$  from the ground-based observations and model results for regional boxes that distinguish urban (red box) and non-urban (green box) region (central plot). Box averaged diurnal cycle (solid lines) of  $O_3$  and 1/4 of standard deviations (filled area) from observations (black), the WRF-Chem simulations using EDGAR-HTAP version 2 (EDV2, green), EDGAR-HTAP version 3 (EDV3, blue), and KORUS-AQ version 5 (KOV5, red) are shown. The diurnal cycle plots represent Northern China (NOC, 38-42°N/106-110°E), Sichuan-Chongqing-Guizhou (SCG, 27-33°N/103-109°E), Pearl River Delta (PRD, 21.5-24°N/112-115.5°E), Southeastern China (SEC, 24-28°N/116-120°E), Yangtze River Delta (YRD, 30-33°N/119-122°E), South Korea (KOR, 34.5-38°N/126-130°E), North China Plain (NCP, 34-41°N/113-119°E), and Northeastern China (NEC, 43-47°N/124-130°E).

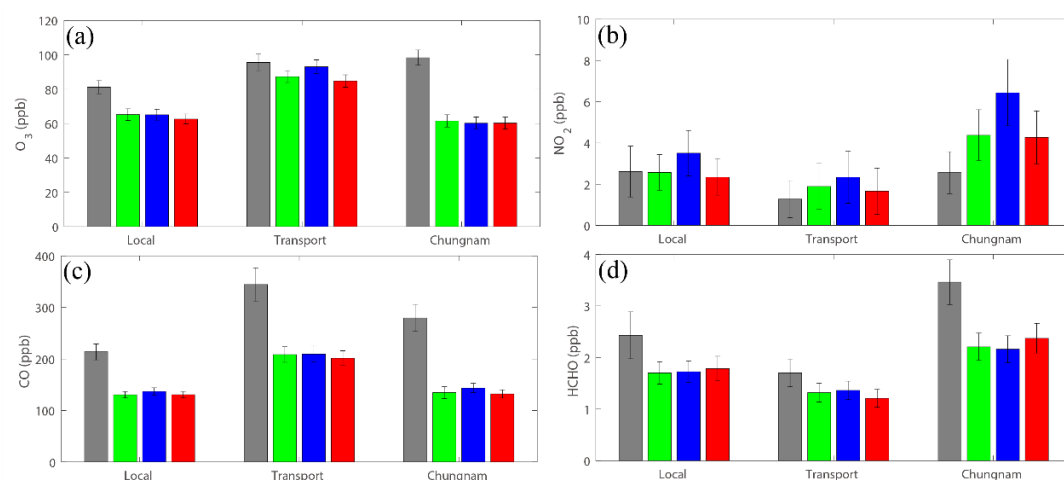

Figure S7. Averaged model and airborne observations of (a) O<sub>3</sub>, (b) NO<sub>2</sub>, (c) CO, and (d) HCHO (bars) and 1/4 of standard deviations (whiskers) (unit: ppbv) under 2 km height for the Local, Transport, and Chungnam cases from DC-8 (grey), EDV2 (green), EDV3 (blue), and KOV5 (red). The Chungnam (Chungcheongnam-do) region has large point sources like coal-burning power plants and petrochemical facilities that are not well-represented in the bottom-up emission inventories. The local case (May/4, May/20, June/2, June/3) and transport case (May/25, May/26, May/31) represent the dates with the smallest and largest influence from Chinese emissions, respectively. The Chungnam case represents the dates when DC-8 had survey flights targeting the urban and point sources in Chungcheongnam-do and downwind.

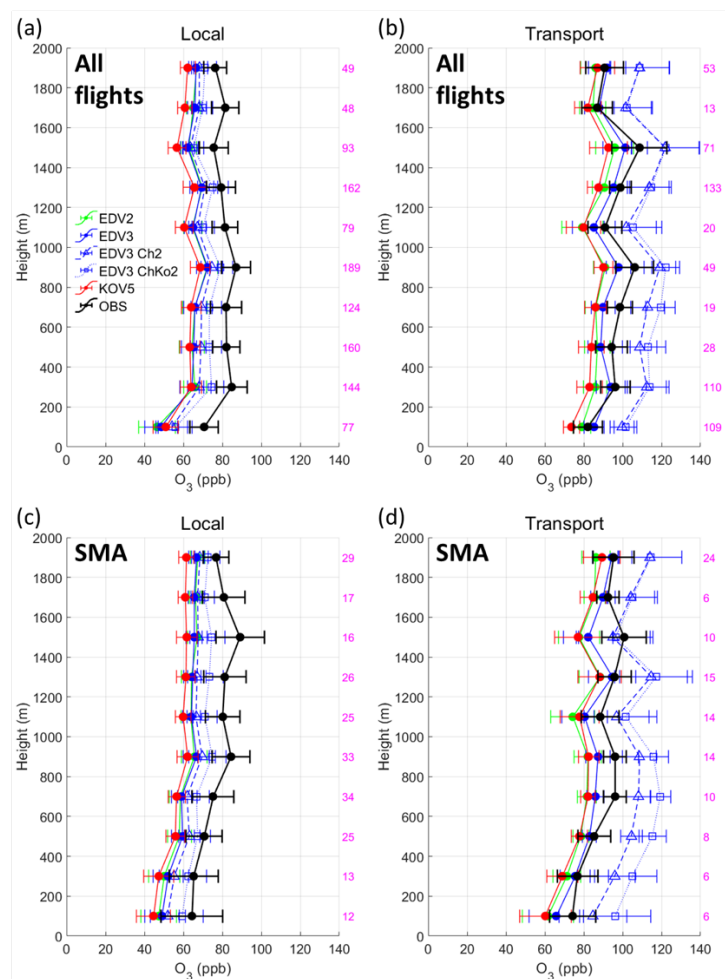

Figure S8. Vertically averaged O<sub>3</sub> from DC-8 (black), EDV2 (green), EDV3 (blue), and KOV5 (red) for the Local and Transport cases under 2 km height above ground level. The 1/2 of standard deviations are represented with black whiskers in each 200m layer. Sensitivity tests are conducted with doubled anthropogenic CO and VOC emissions in China (EDV3\_Ch2, blue triangle dots and dashed lines) and in both China and South Korea (EDV3\_ChKo2, blue open square and dotted lines). The model results co-located with the observations are sampled and compared with each other. The sampling numbers in the layers are represented with magenta color. (a) and (b) include the data from all flights while (c) and (d) select the data over SMA (Seoul Metropolitan Area).



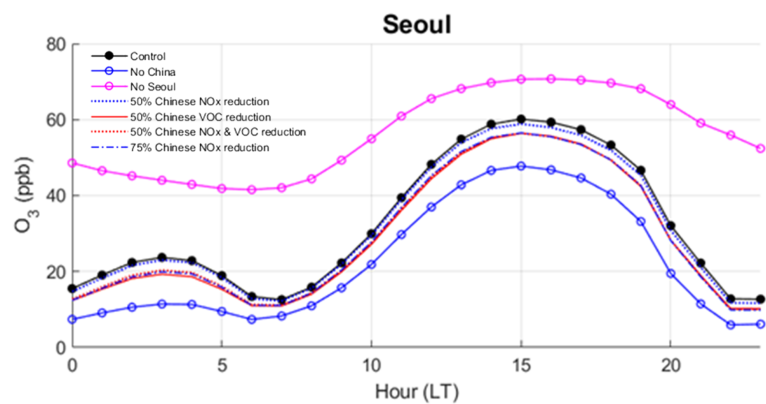

Figure S9. Diurnal variations of the model ozone concentrations at surface from various emission scenarios. The model results were averaged for the full simulation period.

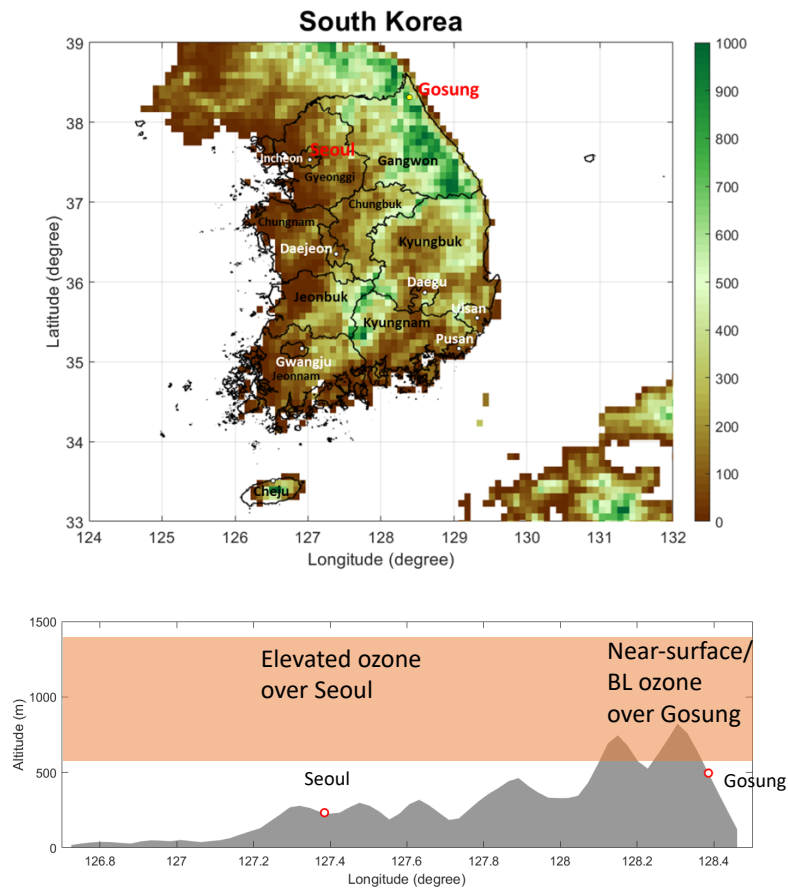

Figure S10. (Top) topography map of South Korea and (bottom) West-East vertical cross-section of terrain connecting Seoul and Gosung. Seoul and Gosung in Gangwon-do are highlighted with color circles. Color bar denotes elevations above sea level (m). A simplified potential ozone transport path is depicted in the bottom plot. Here the ozone layer is colored orange and the terrain is colored gray.

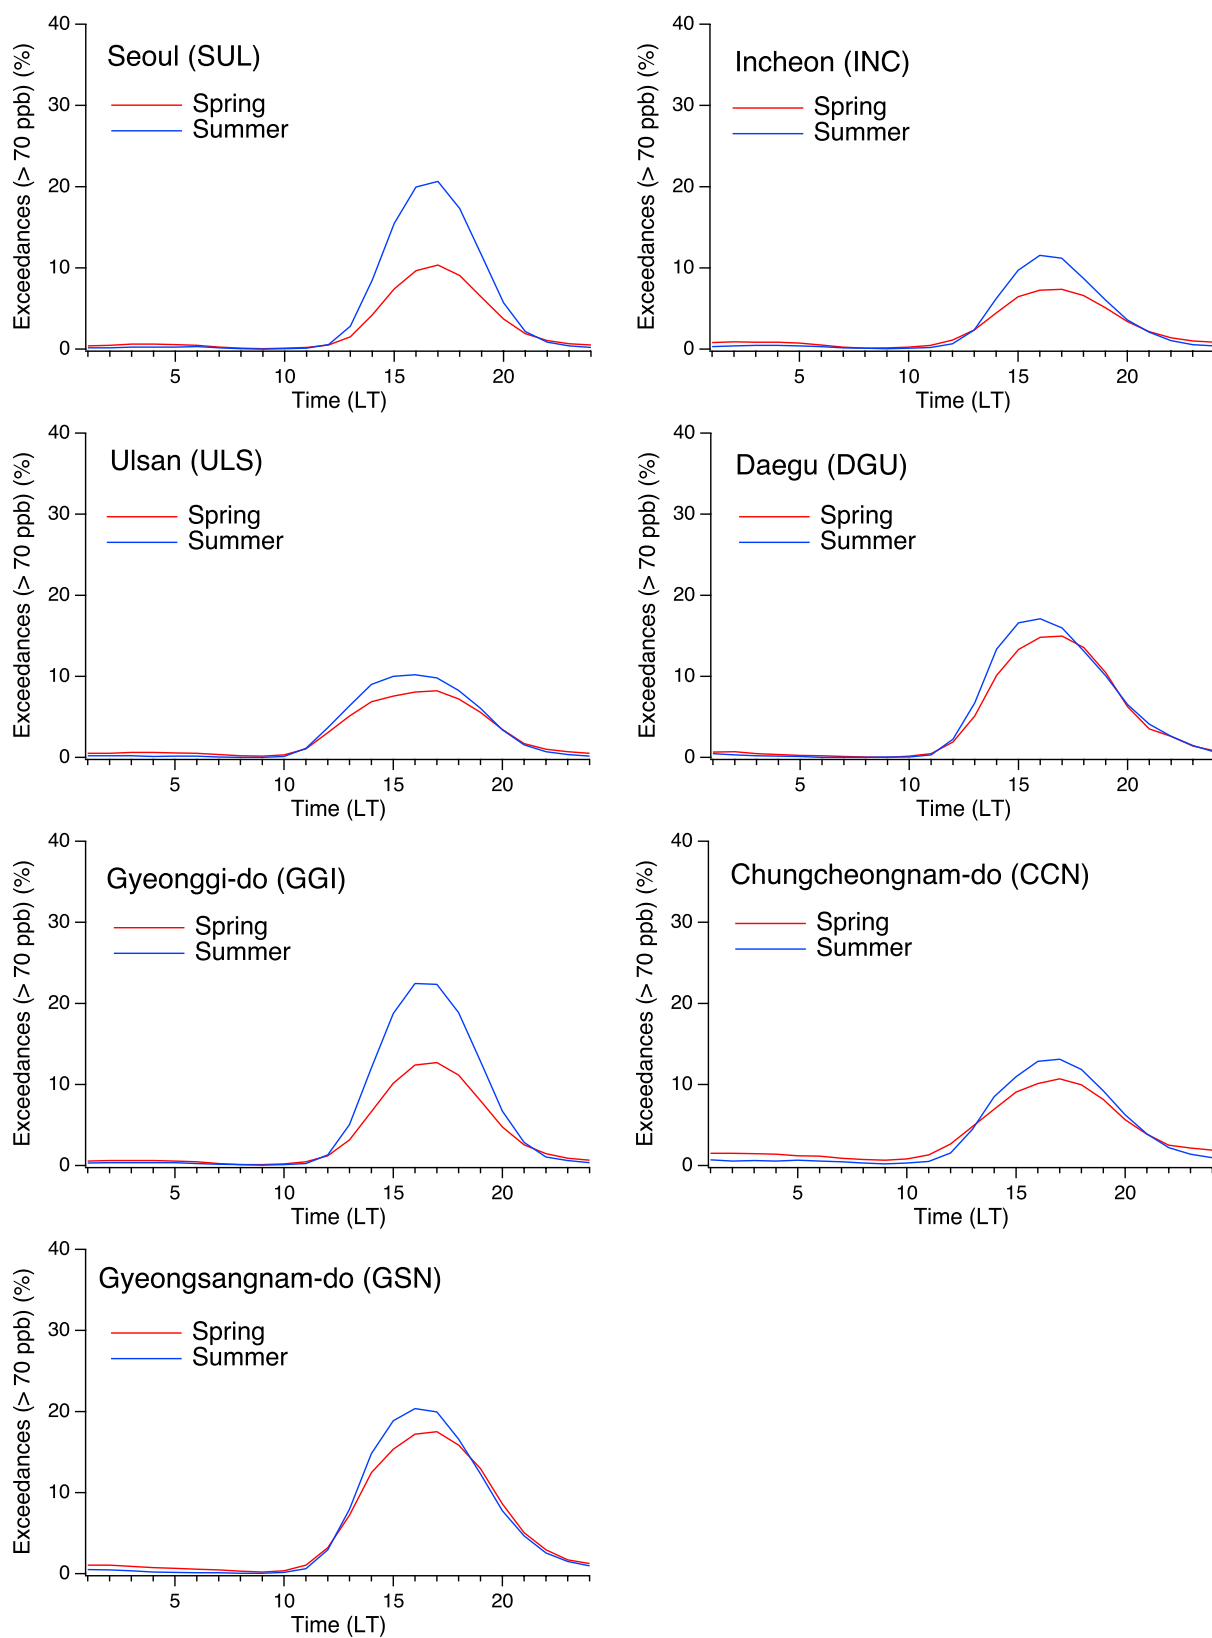

Figure S11. Diurnal O<sub>3</sub> exceedances for the sites that have more exceedances during summer than spring

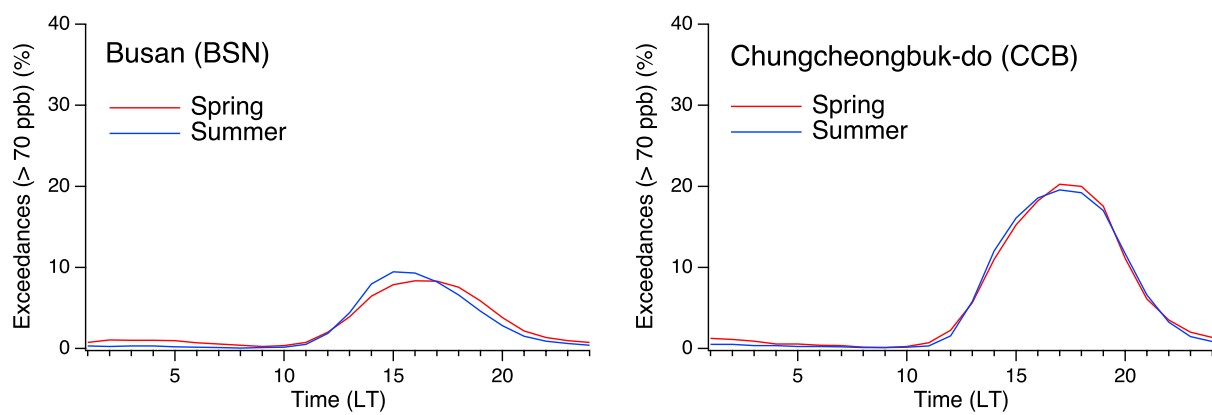

Figure S12. Diurnal O<sub>3</sub> exceedances for the locations that have similar exceedances for spring and summer

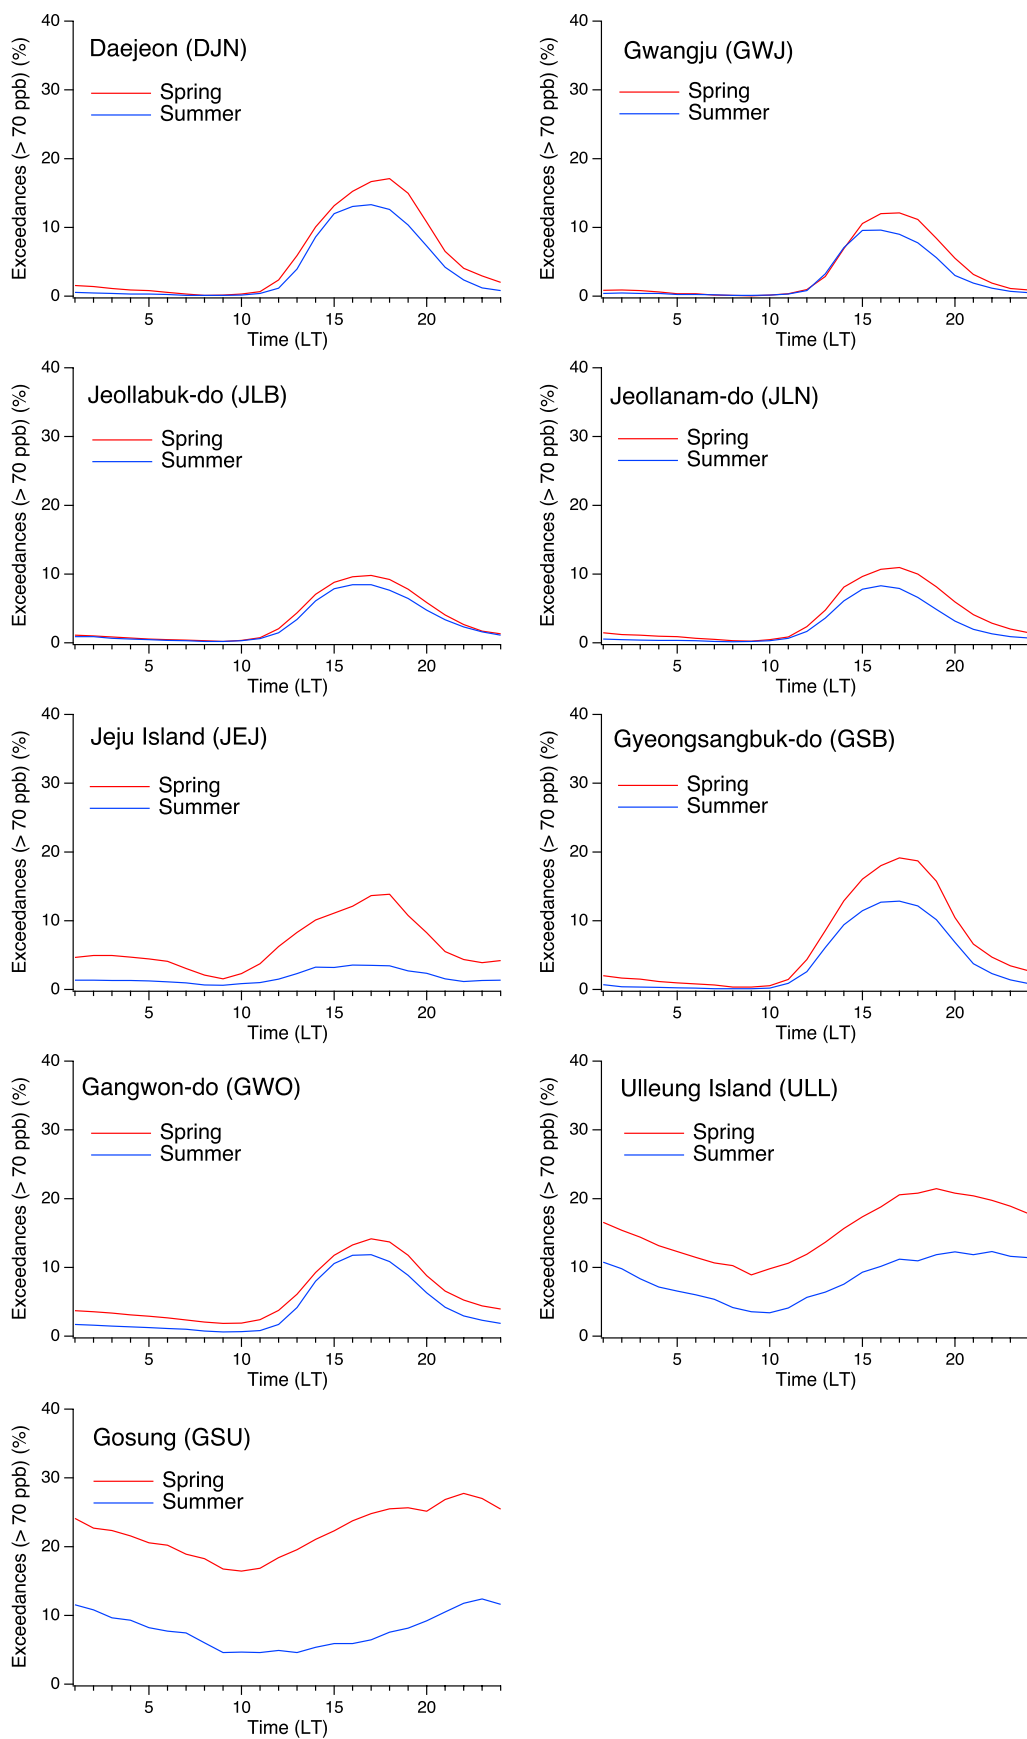

Figure S13. Diurnal O<sub>3</sub> exceedances for the locations that have more exceedances during spring than summer

## 2019 - 2020

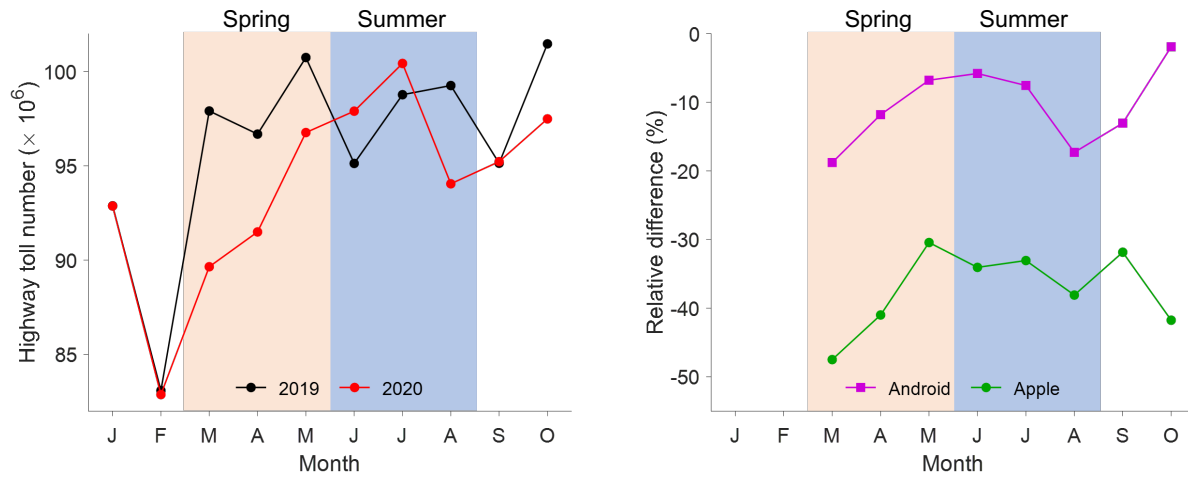

## 2019 - 2021

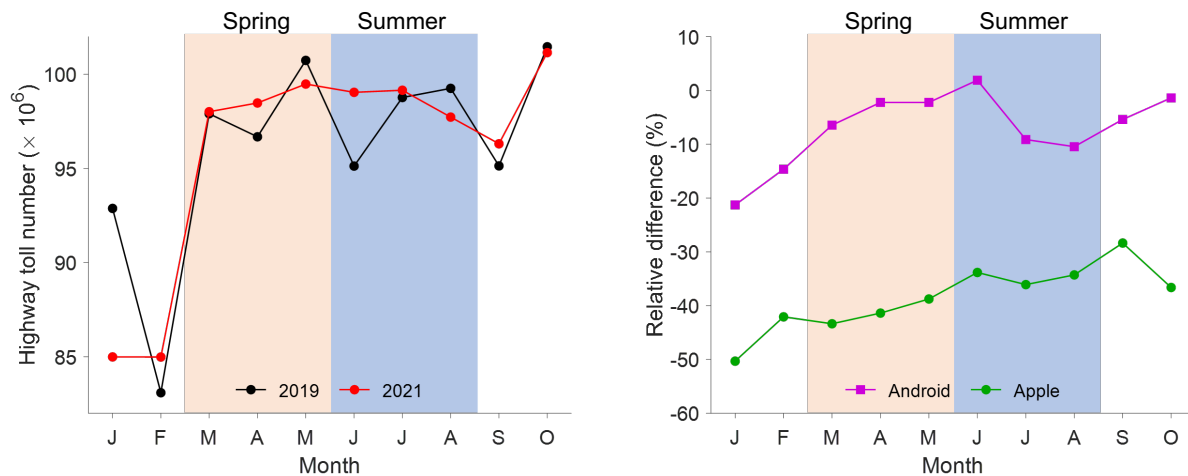

Figure S14. (Left panel) the number of cars passing highway tolls near the Seoul Metropolitan Area (SMA) from January to October in 2019 and 2020 (top) and 2019 and 2021 (bottom) and (Right panel) reductions (%) in mobility based on transit station mobility metrics and driving mobility index in SMA from Google and Apple mobility report, respectively, covering spring and summer in 2020 (top) and 2021 (bottom) relative to 2019.

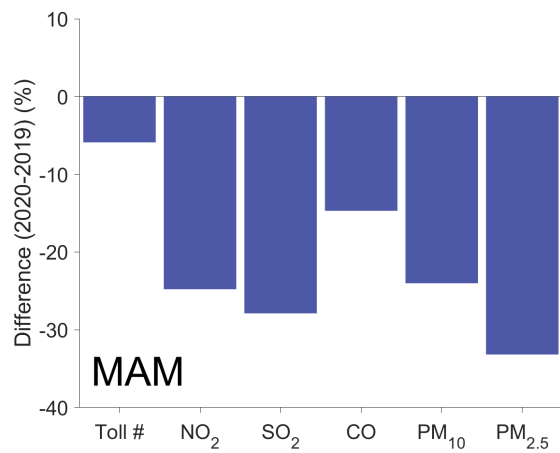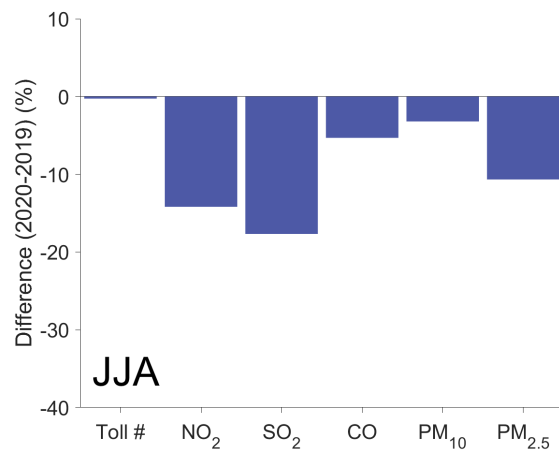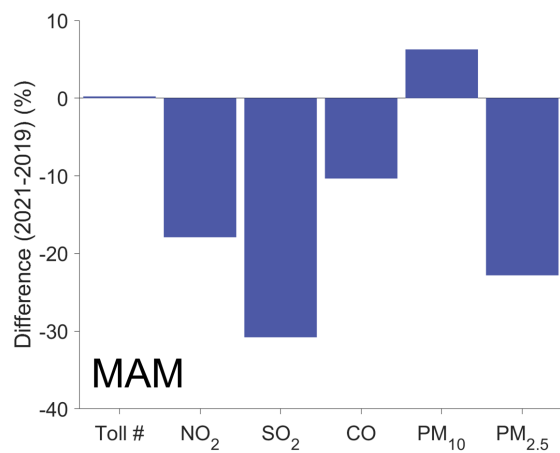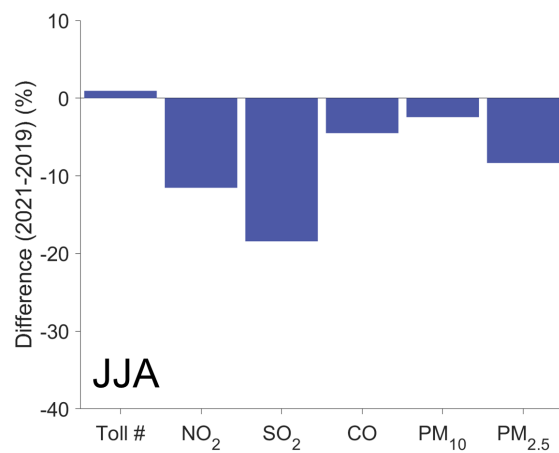

Figure S15. Difference (%) in the toll numbers, NO<sub>2</sub>, SO<sub>2</sub>, CO, PM<sub>10</sub>, and PM<sub>2.5</sub> concentrations in SMA during spring and summer: (top) 2020-2019 and (bottom) 2021-2019.
