# Supplementary material for: Changes in surface ozone in South Korea on diurnal to decadal timescales for the period of 2001–2021
Source: Copernicus journal article supplement (doi:10.5194/acp-23-12867-2023), 2023-10-13
Supplement: Supplementary file 3 [file acp-23-12867-2023-supplement.zip]

Archive with 4 entries (4 files):
- acp-23-12867-2023-supplement-title-page.pdf
- Supplement2.xlsx
- Supplement1.pdf
- Supplement3.pdf
