# Supplementary material for: Changes in surface ozone in South Korea on diurnal to decadal timescales for the period of 2001–2021
Source: Copernicus journal article supplement (doi:10.5194/acp-23-12867-2023), 2023-10-13
Supplement: Supplementary file 3 [file acp-23-12867-2023-supplement.zip › acp-23-12867-2023-supplement-title-page.pdf]

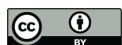

## *Supplement of*

# **Changes in surface ozone in South Korea on diurnal to decadal timescales for the period of 2001–2021**

**Si-Wan Kim et al.**

*Correspondence to:* Si-Wan Kim ([siwan.kim@yonsei.ac.kr](mailto:siwan.kim@yonsei.ac.kr))

- [acp-23-12867-2023-supplement-title-page.pdf](#)
- [Supplement1.pdf](#)
- [Supplement2.xlsx](#)
- [Supplement3.pdf](#)

The copyright of individual parts of the supplement might differ from the article licence.
